# Supplementary material for: Trends in Uptake and Adherence to Oral Anticoagulation for Patients With Incident Atrial Fibrillation at High Stroke Risk Across Health Care Settings
Source: PubMed Central journal article supplement — J Am Heart Assoc. 2022 Jul 25;11(15):e024868. doi: 10.1161/JAHA.121.024868 (PMC9375487; doi:10.1161/jaha.121.024868), 2022-07-25
Supplement: JAH3-11-e024868-s001.pdf [file JAH3-11-e024868-s001.pdf]

## **SUPPLEMENTAL MATERIAL**

## **Data S1. Supplemental Methods**

Based upon ICD-10 codes, patients were classified as having PAD if they had previously documented PAD and/or graft procedures; CKD for estimated glomerular filtration rates of <90 mL per minute per 1.73 m<sup>2</sup> or those with albuminuria; falls if documented on an inpatient or outpatient visit; excess alcohol if diagnosed with alcohol withdrawal, alcohol-related end-organ damage, or rehabilitation for excess alcohol use; major bleeding if a major hemorrhage event and/or a blood transfusion in combination with a clinically-relevant nonmajor bleeding code were documented on an inpatient or outpatient visit.

**Table S1. ICD-10-CA diagnosis and CCI procedure codes**

| Clinical Diagnosis     | ICD-10-CA Codes                                                                                                                                                                                                                                                                                                                                       | CCI Procedure Codes                                                           |
|------------------------|-------------------------------------------------------------------------------------------------------------------------------------------------------------------------------------------------------------------------------------------------------------------------------------------------------------------------------------------------------|-------------------------------------------------------------------------------|
| Valvular disease       | I05 I06 I34 I35 I08.0 I08.1 I08.2 I08.3                                                                                                                                                                                                                                                                                                               | 1.HS.80 1.HS.90 1.HT.80<br>1.HT.89 1.HT.90 1.HU.80<br>1.HU.90 1.HV.80 1.HV.90 |
| Heart Failure          | I25.5 I42.0 I42.6 I42.7 I42.8 I42.9 I43 I50                                                                                                                                                                                                                                                                                                           |                                                                               |
| Hypertension           | I10-I13 I15                                                                                                                                                                                                                                                                                                                                           |                                                                               |
| Diabetes               | E10-E14                                                                                                                                                                                                                                                                                                                                               |                                                                               |
| Stroke/TIA             | I63 I64 H34.1 I61 G45                                                                                                                                                                                                                                                                                                                                 |                                                                               |
| PAD                    | I70 I71 I73.1 I73.8 I73.9 I77.1 I79.0 I79.2 K55.1 K55.8 K55.9<br>Z95.8 Z95.9                                                                                                                                                                                                                                                                          |                                                                               |
| CAD                    | I25.0 I25.1 I25.2 I25.5 I25.8 I25.9                                                                                                                                                                                                                                                                                                                   |                                                                               |
| MI                     | I21 I22                                                                                                                                                                                                                                                                                                                                               |                                                                               |
| Chronic Kidney Disease | N18                                                                                                                                                                                                                                                                                                                                                   |                                                                               |
| Anemia                 | D50-D89 D60-D64                                                                                                                                                                                                                                                                                                                                       |                                                                               |
| Thrombocytopenia       | D69                                                                                                                                                                                                                                                                                                                                                   |                                                                               |
| Falls                  | W00- W19                                                                                                                                                                                                                                                                                                                                              |                                                                               |
| Excess Alcohol         | E52 F10 G62.1 I42.6 K29.2 K70.0 K70.3 K70.9 T51 Z50.2<br>Z71.4 Z72.1                                                                                                                                                                                                                                                                                  |                                                                               |
| Major Bleeding         | H35.6 H43.1 H45.0 I60 I61 I62 M25.0 J94.2 I31.2<br><br>or Transfusion with CRNMB                                                                                                                                                                                                                                                                      |                                                                               |
| Transfusion            | T80.3 T80.4 Y65.0 Z51.3                                                                                                                                                                                                                                                                                                                               | 1.LZ.19                                                                       |
| CRNMB                  | I85.01 I85.11 I85.21 I85.31 I85.41 I85.51 I85.61 I85.71 I85.81<br>I85.91 K22.11 K22.6 K25.0 K25.2 K25.4 K25.6 K26.0 K26.2<br>K26.4 K26.6 K27.0 K27.2 K27.4 K27.6 K28.0 K28.2 K28.4<br>K28.6 K29.01 K29.11 K29.21 K29.31 K29.41 K29.51 K29.61<br>K29.71 K29.81 K29.91 K31.80 K55.21 K62.5 K66.1 K92.0<br>K92.1 K92.2 N02 S06.4 S06.5 S06.6 R04 R31 R58 |                                                                               |

CAD, coronary artery disease; CCI, Canadian Classification of Health Interventions; CRNMB, clinically relevant nonmajor bleeding; CVD, cerebrovascular disease, ICD, International Classification of Disease; PAD, peripheral artery disease; TIA, transient ischemic attack.

**Table S2. Oral anticoagulation ATC codes using the PIN profile**

| <b>Drug Name (generic)</b> | <b>ATC Code</b>  |
|----------------------------|------------------|
| Warfarin                   | B01AA03          |
| Rivaroxaban                | B01AF01, B01AX06 |
| Apixaban                   | B01AF02          |
| Dabigatran                 | B01AE07          |
| Edoxaban                   | B01AF03          |

ATC, Anatomical Therapeutic Chemical classification system; PIN, Pharmaceutical Information Network.

**Table S3. Changes in oral anticoagulation adherence categories over a 3-year period following initiation of therapy**

|                    |                  | NOAC Uptake<br>Transition |               | Warfarin Uptake<br>Transition |               |
|--------------------|------------------|---------------------------|---------------|-------------------------------|---------------|
|                    |                  | Year 1 → 2                | Year 2 → 3    | Year 1 → 2                    | Year 2 → 3    |
|                    |                  | n (%)                     | n (%)         | n (%)                         | n (%)         |
| Starting Adherence | Ending Adherence |                           |               |                               |               |
| High               | High             | 2,250 (86.7%)             | 2,163 (87.7%) | 1,348 (76.7%)                 | 1,472 (74.5%) |
|                    | Moderate         | 259 (10.0%)               | 226 (9.2%)    |                               |               |
|                    | Low              | 87 (3.4%)                 | 77 (3.1%)     | 409 (23.3%)                   | 504 (25.5%)   |
| Moderate           | High             | 203 (43.2%)               | 213 (49.3%)   |                               |               |
|                    | Moderate         | 141 (30.0%)               | 121 (28.0%)   |                               |               |
|                    | Low              | 126 (26.8%)               | 98 (22.7%)    |                               |               |
| Low                | High             | 13 (3.8%)                 | 20 (3.9%)     | 628 (47.8%)                   | 450 (41.1%)   |
|                    | Moderate         | 32 (9.2%)                 | 21 (4.1%)     |                               |               |
|                    | Low              | 301 (87.0%)               | 473 (92.0%)   | 685 (52.2%)                   | 644 (58.9%)   |
| <b>Total</b>       |                  | 3,412                     |               | 3,070                         |               |

Figure S1. CONSORT diagram

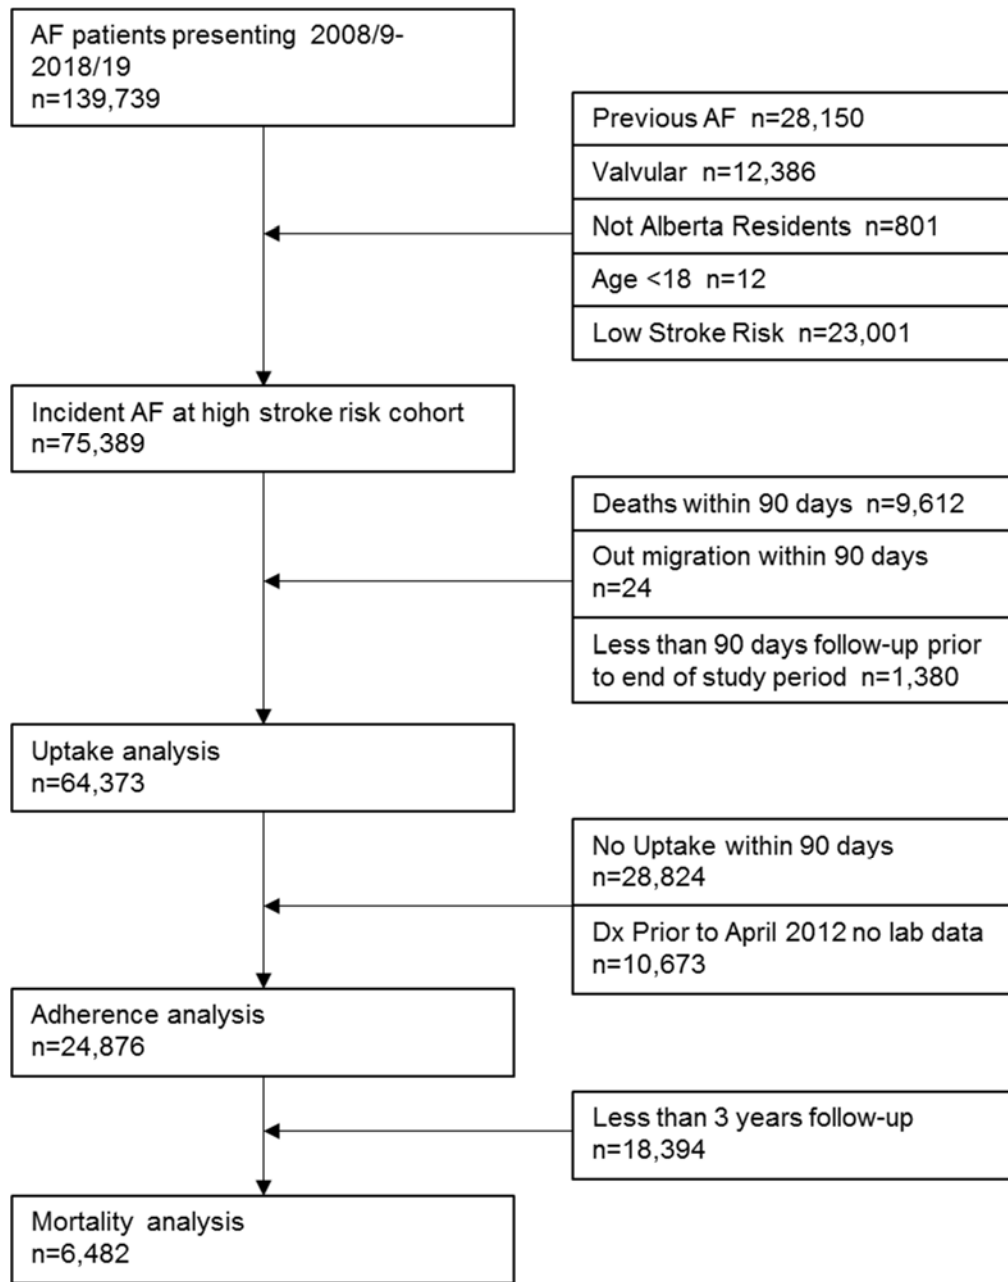

AF, atrial fibrillation; Dx, diagnosis.

Figure S2. Change in OAC class prescription within 1 year

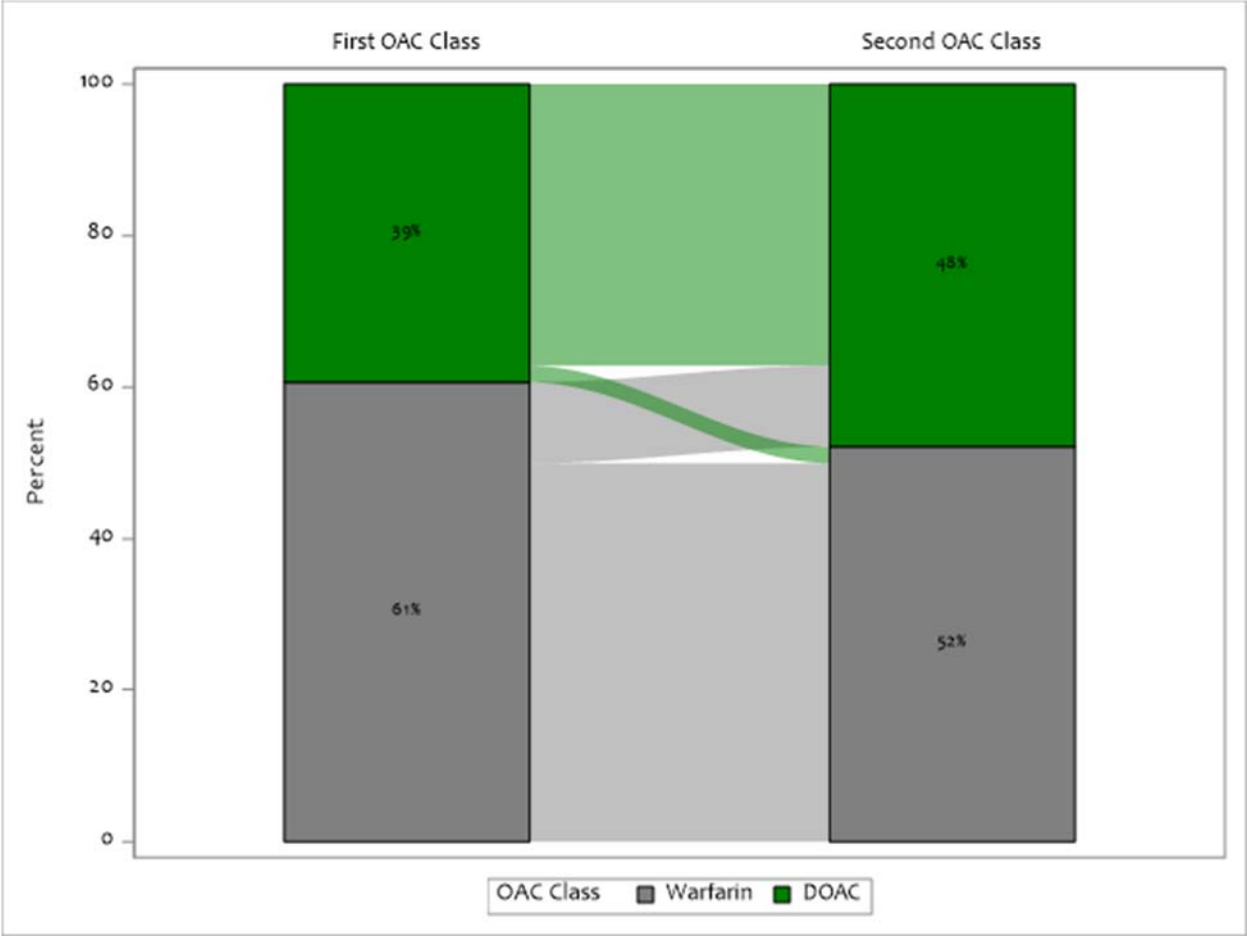

**Figure S3. Predictors associated with OAC uptake**

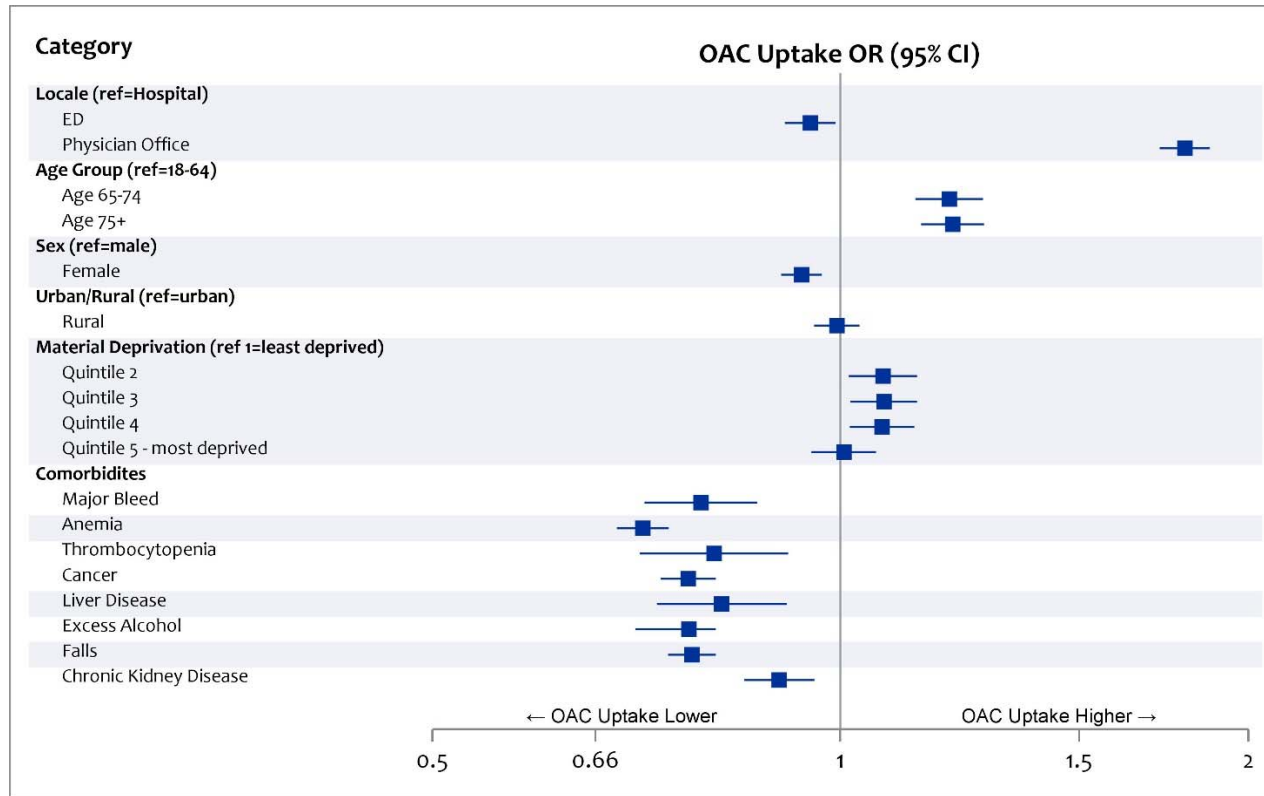

Odds ratios (OR) and 95% confidence intervals (CI) for factors affecting OAC uptake



Figure S4. Change in categories of adherence to DOAC over time

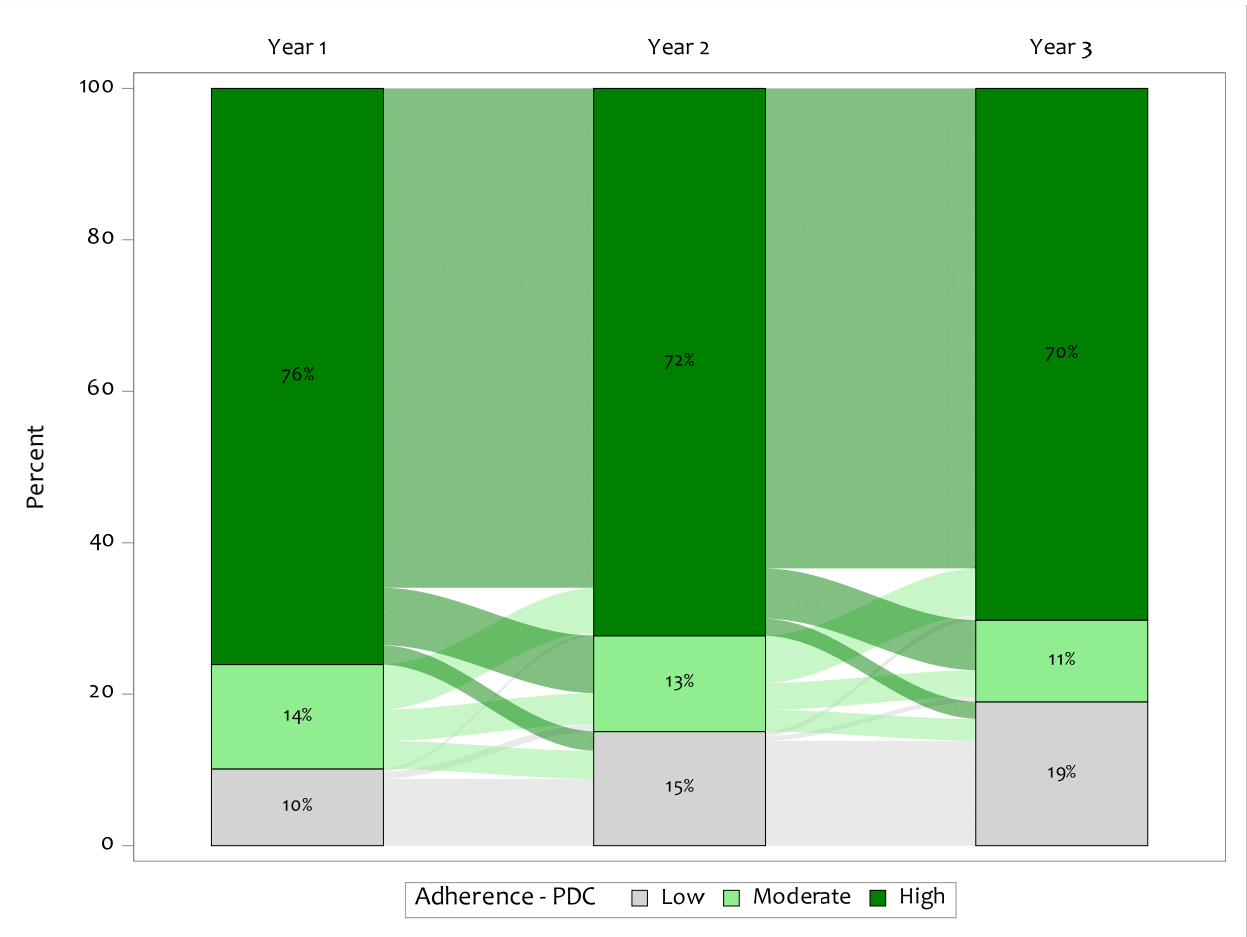

DOAC, direct oral anticoagulant; PDC, proportion of days covered.

Figure S5. Change in categories of adherence to warfarin over time

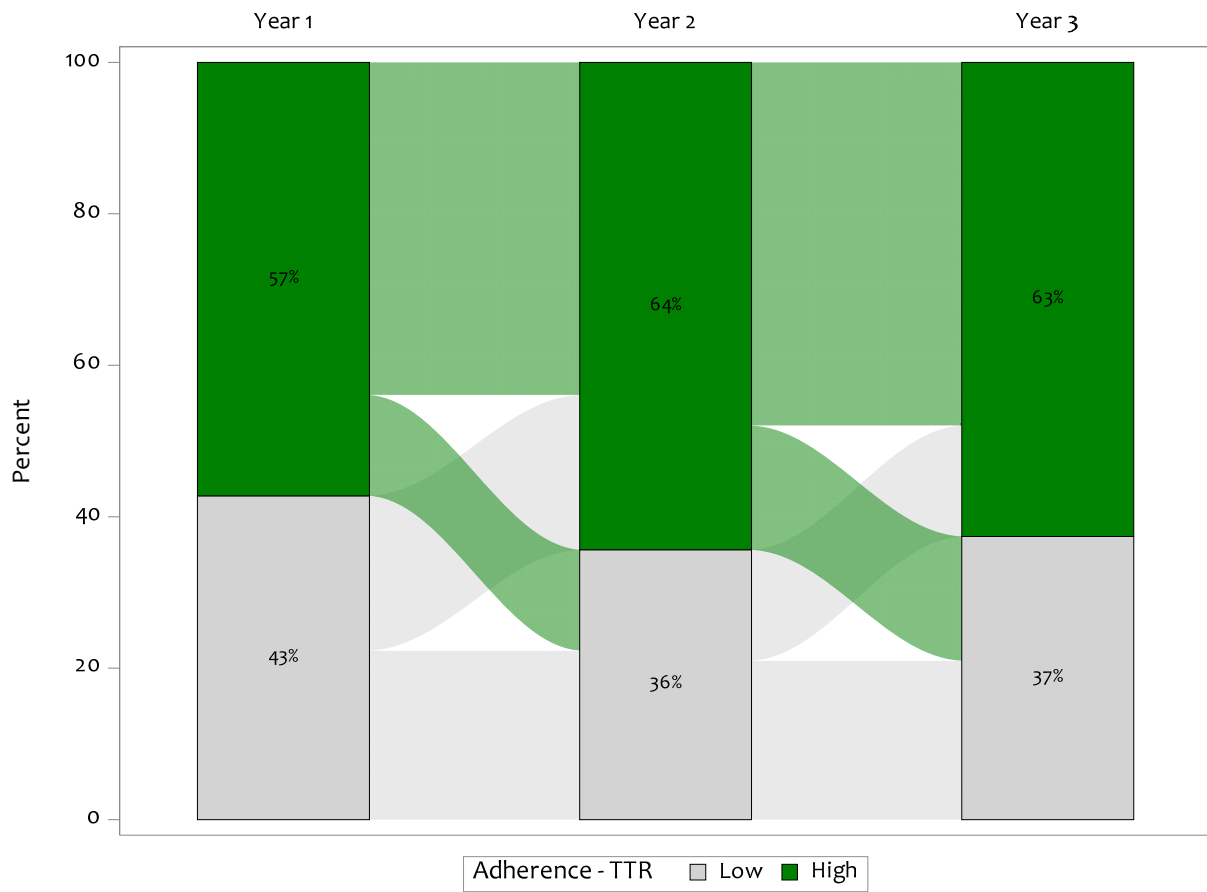

TTR, time in therapeutic range.

**Figure S6. Predictors associated with all-cause mortality**

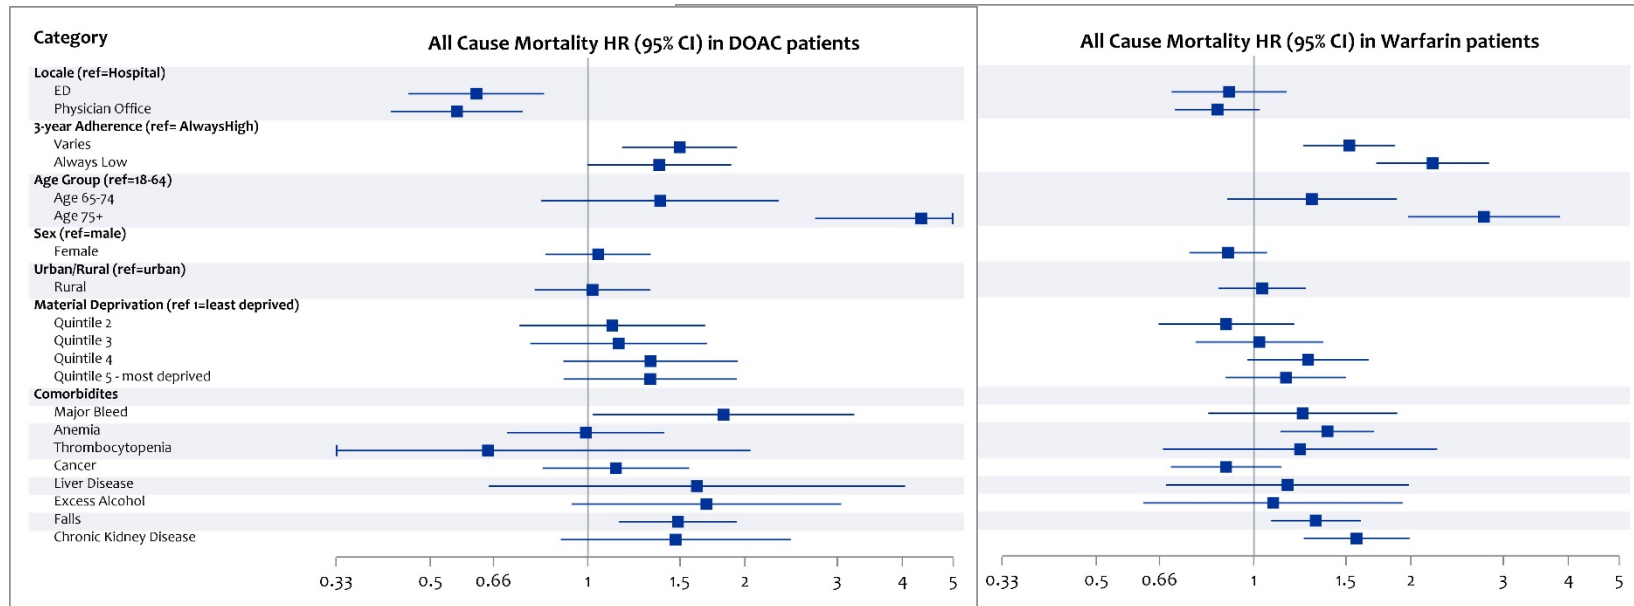

Hazard ratios (OR) and 95% confidence intervals (CI) for factors affecting all cause mortality. Follow up for all cause mortality begins at 3 years after the first OAC dispense.
